# Supplementary material for: State of the Science for Kidney Disorders in Phelan-McDermid Syndrome: UPK3A, FBLN1, WNT7B, and CELSR1 as Candidate Genes
Source: MDPI journal article supplement (doi:10.3390/genes13061042), 2022-06-10
Supplement: s1 [file s1]

## Supplemental Tables

McCoy et al. State of the Science for Kidney Disorders in Phelan-McDermid Syndrome 2022

**Supplemental Table S1.** Genes known to be associated with renal abnormalities used as a training set with ToppGene [1-5]

| Gene                    | Kidney dysplasia | Renal hypoplasia | Renal cysts or Cystic disease | Renal agenesis | Vesicoureteral reflux | Renal hypodysplasia |
|-------------------------|------------------|------------------|-------------------------------|----------------|-----------------------|---------------------|
| <i>BMP4</i>             |                  |                  |                               |                |                       | ✓                   |
| <i>CHDIL</i>            |                  |                  |                               |                | ✓                     | ✓                   |
| <i>DICER1</i>           |                  |                  | ✓                             |                |                       |                     |
| <i>DSTYK</i>            |                  |                  |                               |                |                       | ✓                   |
| <i>EYA1</i>             |                  | ✓                |                               |                |                       |                     |
| <i>FRAS1</i>            |                  |                  |                               | ✓              |                       |                     |
| <i>FREM2</i>            |                  |                  |                               | ✓              |                       |                     |
| <i>GATA3</i>            | ✓                |                  |                               |                |                       |                     |
| <i>GDNF</i>             |                  | ✓                |                               | ✓              |                       |                     |
| <i>GREB1L</i>           |                  | ✓                |                               | ✓              |                       |                     |
| <i>HNF1B</i>            | ✓                | ✓                | ✓                             |                |                       |                     |
| <i>ITGA8</i>            |                  | ✓                |                               | ✓              |                       |                     |
| <i>KAL1/ANOS1</i>       |                  |                  |                               | ✓              |                       |                     |
| <i>MUC1</i>             |                  |                  | ✓                             |                |                       |                     |
| <i>PAX2</i>             | ✓                | ✓                |                               |                |                       |                     |
| <i>PKD1, PKD2</i>       |                  |                  | ✓                             |                |                       |                     |
| <i>RET</i>              |                  | ✓                |                               | ✓              |                       |                     |
| <i>ROBO2</i>            |                  |                  |                               |                | ✓                     |                     |
| <i>SALL1</i>            |                  |                  |                               |                |                       | ✓                   |
| <i>SEMA3A</i>           | ✓                |                  |                               |                |                       |                     |
| <i>SIX1, SIX2, SIX5</i> |                  |                  |                               |                | ✓                     | ✓                   |
| <i>SOX17</i>            |                  |                  |                               |                | ✓                     |                     |
| <i>TNXB</i>             |                  |                  |                               |                | ✓                     |                     |
| <i>TRAP1</i>            |                  |                  |                               | ✓              | ✓                     |                     |
| <i>UMOD</i>             |                  |                  | ✓                             |                |                       |                     |
| <i>UPK3A</i>            |                  | ✓                |                               | ✓              |                       |                     |
| <i>VUR1</i>             |                  |                  |                               |                | ✓                     |                     |
| <i>WNT4</i>             |                  |                  |                               |                |                       | ✓                   |

**Supplemental Table S2.** Source of patient data for the pooled analysis (N=152)

| <i><b>Study</b></i>           | <i><b>Patients included in the study</b></i> |
|-------------------------------|----------------------------------------------|
| Kirkpatrick et al, 2011 [6]   | 1                                            |
| Soorya et al, 2013 [7]        | 30                                           |
| Bonaglia et al, 2011 [8]      | 4                                            |
| Disciglio et al, 2014 [9]     | 9                                            |
| Palumbo et al, 2017 [10]      | 15                                           |
| Fontes et al, 2015 [11]       | 1                                            |
| Ishikawa et al, 2015 [12]     | 1                                            |
| Tabet et al, 2017 [13]        | 46                                           |
| Lei et al, 2016 [14]          | 1                                            |
| Toruner et al, 2009 [15]      | 1                                            |
| Ha et al, 2017 [16]           | 1                                            |
| Samogy-Costa et al, 2019 [17] | 27                                           |
| Xu et al, 2020 [18]           | 15                                           |

**Supplemental Table S3.** Genes within the CNV segments associated with kidney disorders at  $P < 0.05$  with gene location, prioritization rank out of 38 genes, HI < 10% estimate [19], and pLI score if > 0.9 from gnomAD [20].

| <i>Gene</i>          | <i>Empirical P-value</i> | <i>Gene location</i>               | <i>Prioritization rank</i> | <i>pLI &gt; 0.9 or HI &lt; 10%</i> |
|----------------------|--------------------------|------------------------------------|----------------------------|------------------------------------|
| <i>PRR5</i>          | 0.034997                 | chr22:45,064,427-45,133,561        | 15                         |                                    |
| <i>PRR5-ARHGAP8</i>  | 0.020698                 | chr22:45,098,113-45,258,664        | 5                          |                                    |
| <i>ARHGAP8</i>       | 0.020698                 | chr22:45,098,355-45,258,665        | 12                         |                                    |
| <i>PHF21B</i>        | 0.013199                 | chr22:45,277,042-45,405,880        | 21                         | pLI 0.99                           |
| <i>NUP50</i>         | 0.018398                 | chr22:45,559,722-45,583,896        | 13                         |                                    |
| <i>KIAA0930</i>      | 0.007899                 | chr22:45,586,219-45,636,650        | 23                         |                                    |
| <i>MIR1249</i>       | 0.007899                 | chr22:45,596,835-45,596,900        | 26                         |                                    |
| <b><i>UPK3A*</i></b> | <b>0.005399</b>          | <b>chr22:45,680,830-45,691,755</b> | <b>4</b>                   |                                    |
| <i>FAM118A</i>       | 0.0028                   | chr22:45,704,849-45,737,836        | 24                         |                                    |
| <i>SMC1B</i>         | 0.0028                   | chr22:45,739,944-45,809,500        | 11                         |                                    |
| <i>RIBC2</i>         | 0.0017                   | chr22:45,809,572-45,828,376        | 27                         |                                    |
| <b><i>FBLN1</i></b>  | <b>0.0009</b>            | <b>chr22:45,898,118-45,997,015</b> | <b>2</b>                   |                                    |
| <i>ATXN10</i>        | 0.0005                   | chr22:46,067,678-46,241,187        | 8                          |                                    |
| <i>MIR4762</i>       | 0.002                    | chr22:46,156,404-46,156,478        | 33                         |                                    |
| <b><i>WNT7B</i></b>  | <b>0.0003</b>            | <b>chr22:46,316,242-46,373,009</b> | <b>1</b>                   |                                    |
| <i>LOC730668</i>     | 0.0003                   | chr22:46,402,496-46,406,657        | 37                         |                                    |
| <i>LINC00899</i>     | 0.0003                   | chr22:46,435,787-46,440,748        | 36                         |                                    |
| <i>PRR34</i>         | 0.0003                   | chr22:46,445,358-46,450,024        | 20                         |                                    |
| <i>MIRLET7BHG</i>    | 0.0003                   | chr22:46,449,749-46,509,808        | 22                         |                                    |
| <i>MIR3619</i>       | 0.0003                   | chr22:46,486,924-46,487,006        | 30                         |                                    |

|                      |              |                                    |          |                 |
|----------------------|--------------|------------------------------------|----------|-----------------|
| <i>MIRLET7A3</i>     | 0.0003       | chr22:46,508,629-46,508,702        | 18       |                 |
| <i>MIR4763</i>       | 0.0003       | chr22:46,509,446-46,509,537        | 38       |                 |
| <i>MIRLET7B</i>      | 0.0003       | chr22:46,509,566-46,509,648        | 7        |                 |
| <i>PPARA</i>         | 0.0012       | chr22:46,546,424-46,639,653        | 3        | HI 7.3%         |
| <i>CDPF1</i>         | 0.0012       | chr22:46,639,908-46,646,576        | 25       |                 |
| <i>PKDREJ</i>        | 0.0012       | chr22:46,651,560-46,659,219        | 9        |                 |
| <i>TTC38</i>         | 0.0012       | chr22:46,663,858-46,689,905        | 28       |                 |
| <i>GTSE1</i>         | 0.0012       | chr22:46,692,638-46,726,707        | 10       |                 |
| <i>TRMU</i>          | 0.0012       | chr22:46,726,772-46,753,237        | 16       |                 |
| <b><i>CELSR1</i></b> | <b>0.004</b> | <b>chr22:46,756,731-46,933,067</b> | <b>6</b> | <b>pLI 1.00</b> |
| <i>GRAMD4</i>        | 0.004        | chr22:46,971,909-47,075,688        | 19       | pLI 1.00        |
| <i>CERK</i>          | 0.004        | chr22:47,080,307-47,134,158        | 17       |                 |
| <i>TBC1D22A</i>      | 0.0005       | chr22:47,158,518-47,571,342        | 14       |                 |
| <i>LINC00898</i>     | 0.0002       | chr22:48,016,792-48,027,318        | 36       |                 |
| <i>MIR3201</i>       | 0.005199     | chr22:48,670,176-48,670,227        | 31       |                 |
| <i>LOC284933</i>     | 0.006699     | chr22:48,934,712-48,943,199        | 32       |                 |
| <i>MIR4535</i>       | 0.0042       | chr22:49,176,107-49,176,165        | 35       |                 |
| <i>LINC01310</i>     | 0.0042       | chr22:49,262,582-49,294,198        | 34       |                 |

\**UPK3A* is already a known kidney-related gene.

## References

[1] Bertoli Avella, A.; Conte, M.L.; Punzo, F.; Graaf, B.; Lama, G.; La Manna, A.; Polito, C.; Grassia, C.; Nobili, B.; Rambaldi, P.F. *et al.* ROBO2 Gene Variants are Associated with Familial Vesicoureteral Reflux. American Society of Nephrology.Journal **2008**, *19*, 825-831.

- [2] Hu, F.; Sun, L. Recognizable Type of Pituitary, Heart, Kidney and Skeletal Dysplasia mostly Caused by SEMA3A Mutation: A Case Report. *World J Clin Cases* **2019**, *7*, 3310-3315.
- [3] Humbert, C.; Silbermann, F.; Morar, B.; Parisot, M.; Zarhrate, M.; Masson, C.; Tores, F.; Blanchet, P.; Perez, M.; Petrov, Y. *et al.* Integrin Alpha 8 Recessive Mutations are Responsible for Bilateral Renal Agenesis in Humans. *Am J Hum Genet* **2014**, *94*, 288-294.
- [4] Brophy, P.D.; Rasmussen, M.; Parida, M.; Bonde, G.; Darbro, B.W.; Hong, X.; Clarke, J.C.; Peterson, K.A.; Denegre, J.; Schneider, M. *et al.* A Gene Implicated in Activation of Retinoic Acid Receptor Targets is a Novel Renal Agenesis Gene in Humans. *Genetics* **2017**, *207*, 215-228.
- [5] Vivante, A.; Kohl, S.; Hwang, D.; Dworschak, G.C.; Hildebrandt, F. Single-Gene Causes of Congenital Anomalies of the Kidney and Urinary Tract (CAKUT) in Humans. *Pediatr. Nephrol.* **2014**, *29*, 695.
- [6] Kirkpatrick, B.E.; El-Khechen, D. A Unique Presentation of 22q13 Deletion Syndrome: Multicystic Kidney, Orofacial Clefting, and Wilms' Tumor. *Clin Dysmorphol* **2011**, *20*, 53-54.
- [7] Soorya, L.; Kolevzon, A.; Zweifach, J.; Lim, T.; Dobry, Y.; Schwartz, L.; Frank, Y.; Wang, A.T.; Cai, G.; Parkhomenko, E. *et al.* Prospective Investigation of Autism and Genotype-Phenotype Correlations in 22q13 Deletion Syndrome and SHANK3 Deficiency. *Molecular autism* **2013**, *4*, 18.
- [8] Bonaglia, M.C.; Giorda, R.; Beri, S.; De Agostini, C.; Novara, F.; Fichera, M.; Grillo, L.; Galesi, O.; Vetro, A.; Ciccone, R. *et al.* Molecular Mechanisms Generating and Stabilizing Terminal 22q13 Deletions in 44 Subjects with Phelan/McDermid Syndrome. *PLoS Genet* **2011**, *7*, e1002173.
- [9] Disciglio, V.; Lo Rizzo, C.; Mencarelli, M.A.; Mucciolo, M.; Marozza, A.; Di Marco, C.; Massarelli, A.; Canocchi, V.; Baldassarri, M.; Ndoni, E. *et al.* Interstitial 22q13 Deletions Not Involving SHANK3 Gene: A New Contiguous Gene Syndrome. *Am J Med Genet A* **2014**, *164A*, 1666-1676.
- [10] Palumbo, P.; Accadia, M.; Leone, M.P.; Palladino, T.; Stallone, R.; Carella, M.; Palumbo, O. Clinical and Molecular Characterization of an Emerging Chromosome 22q13.31 Microdeletion Syndrome. *American Journal of Medical Genetics Part A* **2018**, *176*, 391-398.
- [11] Fontes, M.I.B.; Santos, A.P.; Molck, M.C.; Simioni, M.; Nascimento, D.L.L.; Andrade, A.K.M.; Rosenberg, C.; Krepschi, A.C.V.; Appenzeller, S.; Monlleó, I.L. *et al.* Genotype-phenotype Correlation of 16p13.3 Terminal Duplication and 22q13.33 Deletion: Natural History of a Patient and Review of the Literature. *American Journal of Medical Genetics Part A* **2016**, *170*, 766-772.
- [12] Ishikawa, N.; Kobayashi, Y.; Fujii, Y.; Yamamoto, T.; Kobayashi, M. Late-Onset Epileptic Spasms in a Patient with 22q13.3 Deletion Syndrome. *Brain Dev.* **2015**, *38*, 109-112.
- [13] Tabet, A.; Rolland, T.; Ducloy, M.; Lévy, J.; Buratti, J.; Mathieu, A.; Haye, D.; Perrin, L.; Dupont, C.; Passemard, S. *et al.* A Framework to Identify Contributing Genes in Patients with Phelan-McDermid Syndrome. *NPJ Genom Med* **2017**, *2*, 32.

[14] Lei, D.; Li, S.; Banerjee, S.; Zhang, H.; Li, C.; Hou, S.; Chen, D.; Yan, H.; Li, H.; Peng, H.H. *et al.* Clinical and Genomic Evaluation of a Chinese Patient with a Novel Deletion Associated with Phelan-McDermid Syndrome. *Oncotarget* **2016**, *7*, 80327-80335.

[15] Toruner, G.A.; Kurvathi, R.; Sugalski, R.; Shulman, L.; Twersky, S.; Pearson, P.G.; Tozzi, R.; Schwalb, M.N.; Wiley, Wallerstein R. Copy number variations in three children with sudden infant death. *Clin Genet* 2009; *76*: 63–68. John; Sons, A. *et al.* Copy Number Variations in Three Children with Sudden Infant Death. **2009**.

[16] Ha, J.F.; Ahmad, A.; Lesperance, M.M. Clinical Characterization of Novel Chromosome 22q13 Microdeletions. *Int. J. Pediatr. Otorhinolaryngol.* **2016**, *95*, 121-126.

[17] Samogy-Costa, C.I.; Varella-Branco, E.; Monfardini, F.; Ferraz, H.; Fock, R.A.; Barbosa, R.H.A.; Pessoa, A.L.S.; Perez, A.B.A.; Lourenço, N.; Vibranovski, M. *et al.* A Brazilian Cohort of Individuals with Phelan-McDermid Syndrome: Genotype-Phenotype Correlation and Identification of an Atypical Case. *J Neurodev Disord* **2019**, *11*, 13.

[18] Xu, N.; Lv, H.; Yang, T.; Du, X.; Sun, Y.; Xiao, B.; Fan, Y.; Luo, X.; Zhan, Y.; Wang, L. *et al.* A 29 Mainland Chinese Cohort of Patients with Phelan–McDermid Syndrome: Genotype–phenotype Correlations and the Role of SHANK3 Haploinsufficiency in the Important Phenotypes. *Orphanet J Rare Dis* **2020**, *15*.

[19] Huang, N.; Lee, I.; Marcotte, E.M.; Hurles, M.E. Characterising and Predicting Haploinsufficiency in the Human Genome. *PLoS Genet* **2010**, *6*, e1001154.

[20] Karczewski, K.J.; Francioli, L.C.; Tiao, G.; Cummings, B.B.; Alföldi, J.; Wang, Q.; Collins, R.L.; Laricchia, K.M.; Ganna, A.; Birnbaum, D.P. *et al.* The Mutational Constraint Spectrum Quantified from Variation in 141,456 Humans. *Nature* **2020**, *581*, 434-443.
